# Supplementary material for: Suitability and Allocation of Protein-Containing Foods According to Protein Tolerance in PKU: A 2022 UK National Consensus
Source: MDPI journal article supplement (doi:10.3390/nu14234987), 2022-11-24
Supplement: s1 [file s1]

## SUPPLEMENTARY DATA – Table S1

### Protein cut off points

Some patients with PKU (with or without sapropterin treatment) tolerate over 10g/protein daily. The types of food we recommended in their diet will vary according to individual protein tolerance. At what patient daily protein tolerance should the following foods be included in the diet? This is particularly important to determine now that we can use sapropterin with patients.

What is your opinion? Please choose a protein cut off point for each food category according to the daily protein tolerance. Put a **x** in the box that you would consider the protein tolerance cut off point when you consider it reasonable (e.g., a useful food portion could be eaten) to allow any of the following foods

| FOOD GROUPS                                                                                                                                                                                                                                         | Allowed<br>10g<br>protein/<br>day | Allowed<br>15g<br>protein/<br>day | Allowed<br>20g<br>protein/<br>day | Allowed<br>25g<br>protein/<br>day | Allowed<br>30g<br>protein/<br>day | Allowed<br>40g<br>protein/<br>day | Allowed<br>50g<br>protein/<br>day | Allowed<br>60g<br>protein/<br>day |
|-----------------------------------------------------------------------------------------------------------------------------------------------------------------------------------------------------------------------------------------------------|-----------------------------------|-----------------------------------|-----------------------------------|-----------------------------------|-----------------------------------|-----------------------------------|-----------------------------------|-----------------------------------|
| Meat (lamb, beef, pork, ham, bacon, chicken, turkey, duck, game, beef jerky, corned beef, beef or higher protein meat burgers, meat paste, meat pies). Offal (liver, kidney, tongue). Burgers<br><b>Definition contains protein over 20g/100g -</b> |                                   |                                   |                                   |                                   |                                   |                                   |                                   |                                   |
| Chicken dippers, breaded chicken steaks, chicken nuggets, breaded chicken goujons, chicken fingers, chicken roll, chicken burgers, chicken bites, pork pies,                                                                                        |                                   |                                   |                                   |                                   |                                   |                                   |                                   |                                   |

|                                                                                                                                                                                  |  |  |  |  |  |  |  |  |
|----------------------------------------------------------------------------------------------------------------------------------------------------------------------------------|--|--|--|--|--|--|--|--|
| sausages, chopped pork. Billie bear meat,<br>small meat protein burgers<br><br><b>Definition contains protein 10-20g/100g</b>                                                    |  |  |  |  |  |  |  |  |
| Canned Pork sausages and baked beans,<br>faggots, canned beef ravioli, sausage rolls<br><br><b>Definition contains protein 5--10g/100g</b>                                       |  |  |  |  |  |  |  |  |
| Fish (all varieties including shellfish,<br>frozen)<br><br><b>Definition contains protein over<br/>20g/100g</b>                                                                  |  |  |  |  |  |  |  |  |
| Breaded cod fillets, fish fingers, fishcakes,<br>tinned fish in sauce, fish paste<br><br><b>Definition contains protein 10-20g/100g</b>                                          |  |  |  |  |  |  |  |  |
| <b>Plant meats/fish</b><br><br>Containing soya, lentils, pea protein,<br>Quorn based products<br><br><b>Definition contains protein over<br/>20g/100g</b>                        |  |  |  |  |  |  |  |  |
| <b>Plant meats/fish alternatives</b><br><br>Containing soya, lentils, pea protein, tofu,<br>Quorn based products<br><br><b>Definition contains protein over 10-<br/>20g/100g</b> |  |  |  |  |  |  |  |  |
| <b>Plant meats/fish</b><br><br>Containing vegetable/plant protein<br><br><b>Definition contains protein 5--10g/100g</b>                                                          |  |  |  |  |  |  |  |  |

|                                                                                                                    |  |  |  |  |  |  |  |  |
|--------------------------------------------------------------------------------------------------------------------|--|--|--|--|--|--|--|--|
| Hens Eggs – boiled, poached, fried, scrambled, omelette<br><br><b>Definition contains protein over 10-20g/100g</b> |  |  |  |  |  |  |  |  |
| Hard Cheese<br><br><b>Definition contains protein over 20g/100g</b>                                                |  |  |  |  |  |  |  |  |
| Soft cheese<br><br><b>Definition contains protein 5--10g/100g</b>                                                  |  |  |  |  |  |  |  |  |
| Cheese spread, feta, cottage cheese<br><br><b>Definition contains protein over 10-20g/100g</b>                     |  |  |  |  |  |  |  |  |
| Nuts e.g. peanuts, peanut butter, almonds, pistachio<br><br><b>Definition contains protein over 20g/100g</b>       |  |  |  |  |  |  |  |  |
| Nuts e.g. pine, brazil, cashew, pecan, walnuts<br><br><b>Definition contains protein over 10-20g/100g</b>          |  |  |  |  |  |  |  |  |
| Seeds e.g. sesame, pumpkin, chia, poppy, flax<br><br><b>Definition contains protein over 20g/100g</b>              |  |  |  |  |  |  |  |  |
| Yeast extract spreads e.g. Marmite, Vegemite, Bovril<br><br><b>Definition contains protein over 20g/100g</b>       |  |  |  |  |  |  |  |  |

|                                                                                                                                                                                                                          |  |  |  |  |  |  |  |  |
|--------------------------------------------------------------------------------------------------------------------------------------------------------------------------------------------------------------------------|--|--|--|--|--|--|--|--|
| Bread e.g., bread roll, English muffin, bagels, ciabatta, wrap, croissants<br><b>Definition contains protein <math>\leq</math> 12g/100g</b>                                                                              |  |  |  |  |  |  |  |  |
| Flours e.g., chickpea, almond, coconut, peasemeal, chestnut flour<br><b>Definition contains protein around 20g/100g</b>                                                                                                  |  |  |  |  |  |  |  |  |
| Flour and starch e.g., white, self-raising, wholemeal, chapatti, bread mixes, gram flour, spelt flour, sorghum flour, atta flour, spelt flour, cornmeal<br><b>Definition contains protein <math>\leq</math> 12g/100g</b> |  |  |  |  |  |  |  |  |
| Gluten free flour, rye flour, rice flour, cornmeal/polenta<br><b>Definition contains protein <math>&lt;</math> 10g/100g</b>                                                                                              |  |  |  |  |  |  |  |  |
| Pasta e.g., pea<br><b>Definition contains protein 10g/100g</b>                                                                                                                                                           |  |  |  |  |  |  |  |  |
| Pasta.e.g. wheat, spelt<br><b>Definition contains protein 10-15g/100g</b>                                                                                                                                                |  |  |  |  |  |  |  |  |
| Gluten free pasta<br><b>Definition contains protein 5--10g/100g</b>                                                                                                                                                      |  |  |  |  |  |  |  |  |
| Pot Noodles<br><b>Definition contains protein 5--12g per pot</b><br><b>NOT high protein pots</b>                                                                                                                         |  |  |  |  |  |  |  |  |
| Dried Legumes/pulses e.g., Lentils, chickpeas, dried peas, split peas. Beans – baked, red & black,                                                                                                                       |  |  |  |  |  |  |  |  |

|                                                                                                                                                                                                              |  |  |  |  |  |  |  |  |
|--------------------------------------------------------------------------------------------------------------------------------------------------------------------------------------------------------------|--|--|--|--|--|--|--|--|
| <b>Definition contains protein 10-25g/100g</b><br>This is not the same as lentils canned in water                                                                                                            |  |  |  |  |  |  |  |  |
| Lentils in water/brine/sauce (jars/canned)<br>Baked beans<br>Chickpeas, tinned red, black, kidney beans, mixed beans, black-eyed beans in water/brine/sauce<br><b>Definition contains protein 5-10g/100g</b> |  |  |  |  |  |  |  |  |

## SUPPLEMENTARY DATA – Table S2

**Final consensus for the allocation of food groups according to individual patient protein tolerance  
(including  $\geq 10$ g protein/day)**

| Patient daily protein tolerance | Foods/Food Groups allocated     | Protein content/100g |
|---------------------------------|---------------------------------|----------------------|
| $\geq 10$ g protein/day         | Milk (animal)                   | <5g/100ml            |
|                                 | Yoghurt (animal)/dairy desserts | <10g                 |
|                                 | Hummus                          | 5-10g                |
|                                 | Coconut products                | <10g                 |
|                                 | Gluten-free breads              | $\leq 5$ g           |
|                                 |                                 |                      |
| $\geq 15$ g protein/day         | Lentils in brine                | 5-10g                |
|                                 | Soft cheese                     | 5-10g                |
|                                 | Cheese spread                   | 10-20g               |
|                                 | Bread and bread products        | $\leq 12$ g          |
|                                 | Gluten-free flour               | $\leq 10$ g          |
|                                 | Gluten-free pasta               | 5-10g                |
|                                 |                                 |                      |
| $\geq 20$ g protein/day         | Nuts                            | >20g                 |
|                                 | Flours                          | ~20g and $\leq 12$ g |
|                                 | Meat products                   | 5-10g                |
|                                 | Plant alternatives              | 5-10g                |
|                                 | Nuts                            | ~10-20 g             |
|                                 | Hard cheese                     | >20g                 |
|                                 | Pot noodles                     | 5-12g/pot            |
|                                 | Pasta                           | ~10g and 10-15g      |
|                                 | Seeds                           | >20g                 |
|                                 | Yeast extract                   | >20g                 |
|                                 | Eggs                            | 10-20g               |
|                                 | Dried legumes                   | 10-25g               |
|                                 |                                 |                      |
| $\geq 30$ g protein/day         | Meat/Fish                       | >10-20g              |
|                                 | Plant foods                     | >10-20g              |
|                                 |                                 |                      |
| $\geq 40$ g protein/day         | Meat/Fish                       | >20g                 |
|                                 | Plant foods                     | >20g                 |
